# Supplementary material for: Highly Precise Measurement of HIV DNA by Droplet Digital PCR
Source: PLOS journal article supplement (doi:10.1371/journal.pone.0055943), 2013-04-03

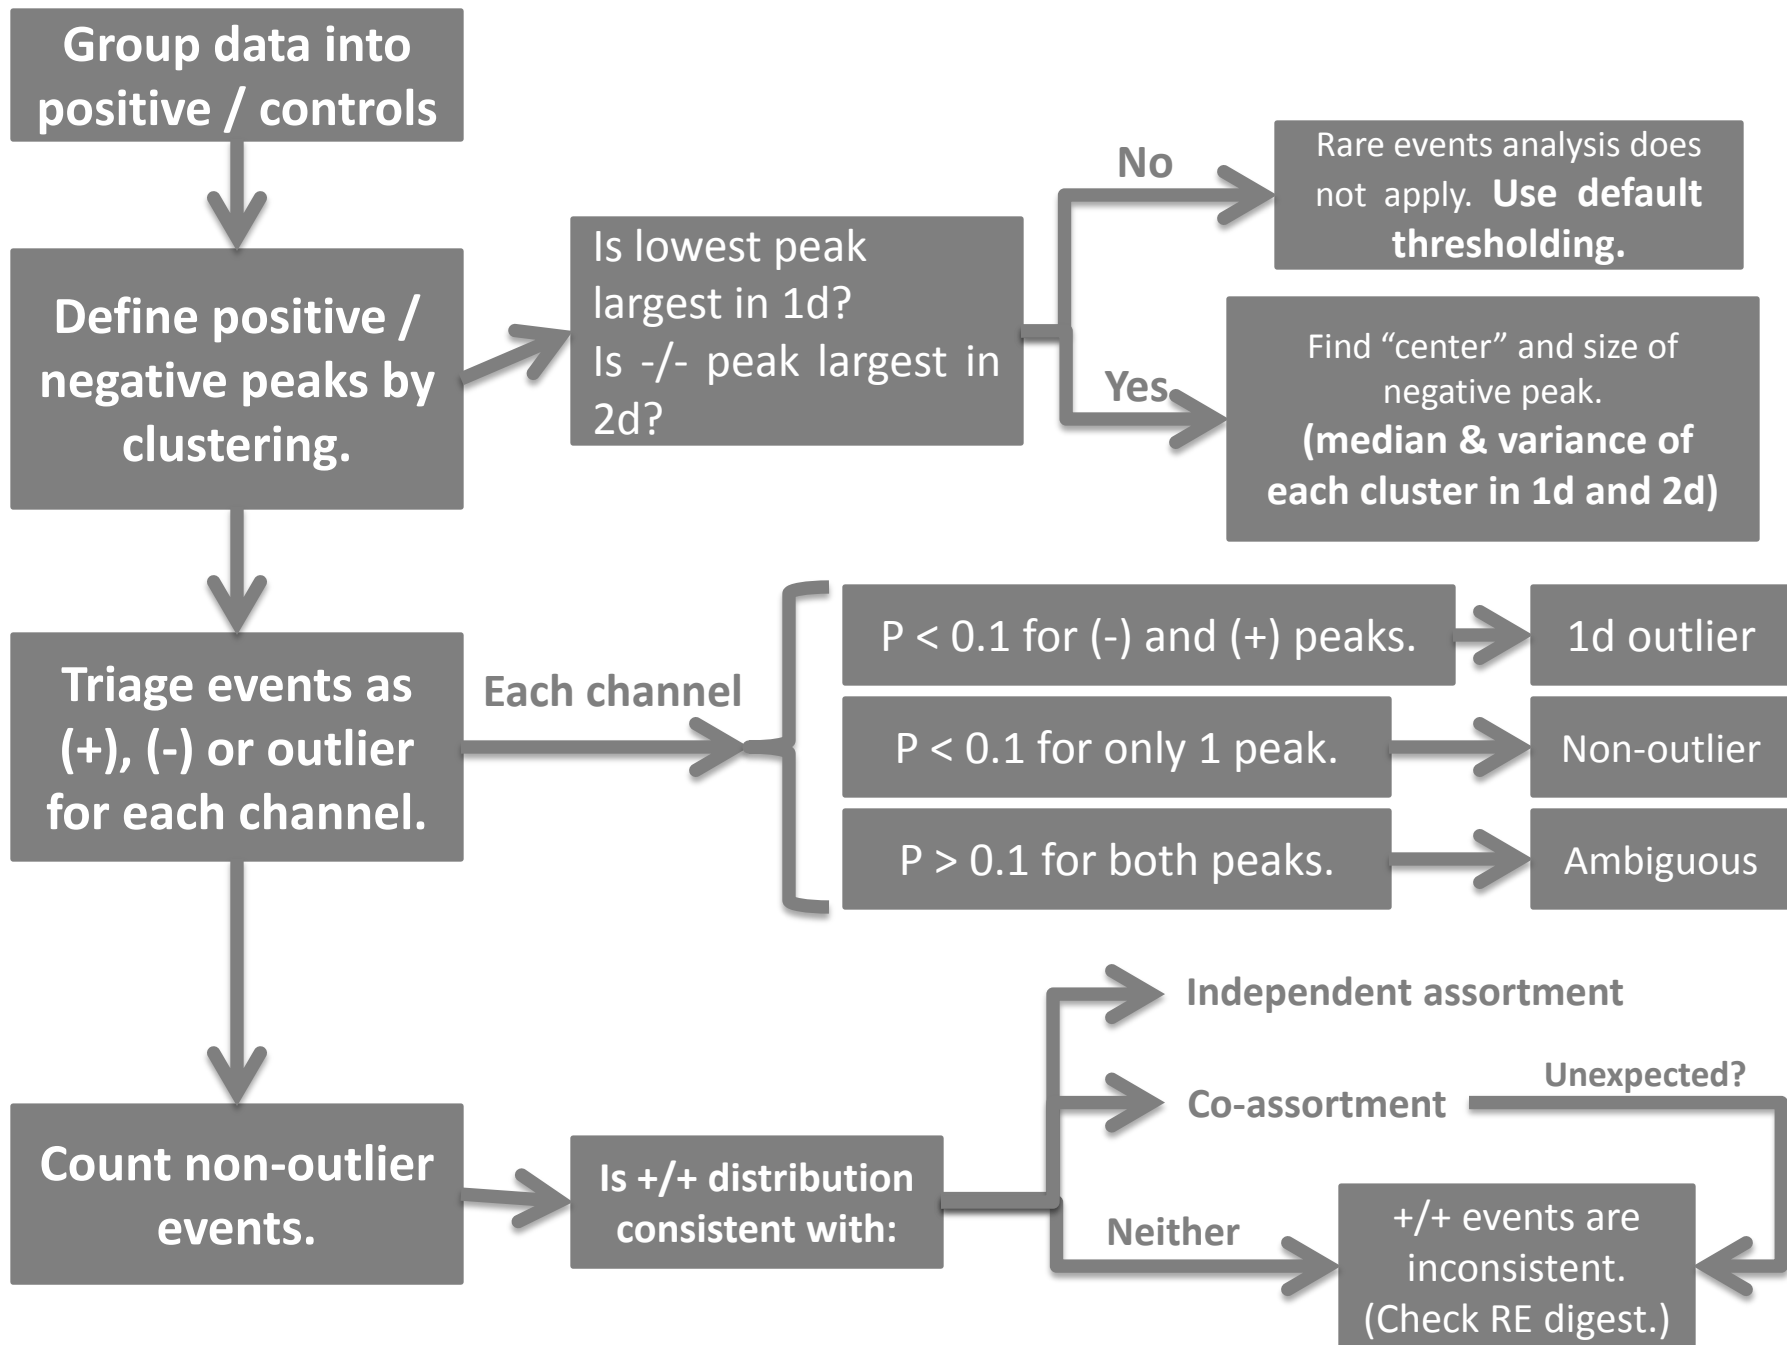

Supplement: S5 (10.1371/journal.pone.0055943.s005) [file journal.pone.0055943.s005]
